# Supplementary material
Source: PubMed Central journal article supplement (PMC551485)
Supplement: mbc_E04-06-0523_1.pdf [file mbc_E04-06-0523_1.pdf]

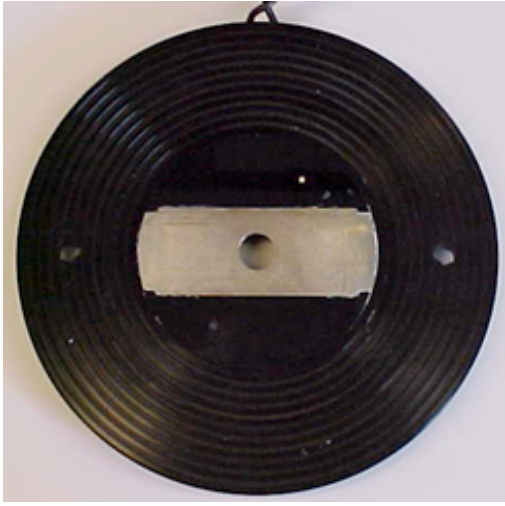

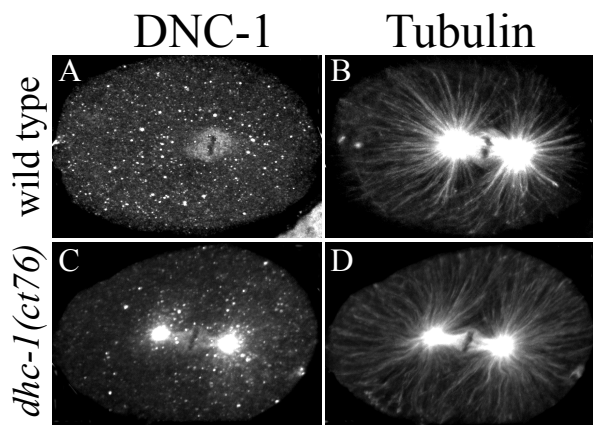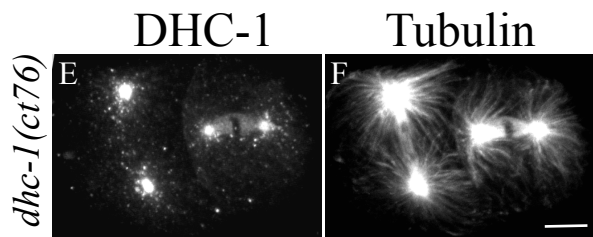

Table s1.

Chi-squared tests were performed on pairs of genotypes from Table 1, to determine which percentages are statistically different from each other. Degrees of freedom = 1 for all comparisons.

| <u>Genotypes compared</u>                                   | <u>% multinucleate cells</u> | <u><math>\chi^2</math></u> | <u>p value</u> |
|-------------------------------------------------------------|------------------------------|----------------------------|----------------|
| wild type with no plasmid at 30°C                           | 0.2 (1 of 403)               | 72.3                       | <0.001         |
| <i>dhc1</i> $\Delta$ with no plasmid at 30°C                | 17.3 (60 of 347)             |                            |                |
| wild type with no plasmid at 30°C                           | 0.2 (1 of 403)               | 72.74                      | <0.001         |
| wild type with <i>dhc1</i> (G-E) plasmid at 30°C            | 17.4 (59 of 339)             |                            |                |
| <i>dhc1</i> $\Delta$ with no plasmid at 30°C                | 17.3 (60 of 347)             | 0.002                      | 0.97           |
| wild type with <i>dhc1</i> (G-E) plasmid at 30°C            | 17.4 (59 of 339)             |                            |                |
| wild type with <i>dhc1</i> (G-E) plasmid at 30°C            | 17.4 (59 of 339)             | 25.75                      | <0.001         |
| wild type with <i>dhc1</i> (G-E) plasmid at 16°C            | 3.2 (7 of 219)               |                            |                |
| <i>dhc1</i> $\Delta$ with no plasmid at 30°C                | 17.3 (60 of 347)             | 4.00                       | 0.045          |
| <i>dhc1</i> $\Delta$ with <i>dhc1</i> (G-E) plasmid at 30°C | 23.2 (90 of 387)             |                            |                |

Table s2. Percent embryonic lethality in *dhc-1* embryos at different temperatures.

| Maternal genotype    | 16°C | 18.4°C | 19°C | 20°C |
|----------------------|------|--------|------|------|
| <i>dhc-1(ct76)/+</i> | 17   | 100    | 100  | 100  |
| <i>dhc-1(ct77)/+</i> | 11   | 44     | 56   | 100  |
| <i>dhc-1(or195)</i>  | 3    | ND     | ND   | ND   |

n>800 for each sample

Table s3. Quantification of events in wild-type and *dhc-1* mutant embryos.

| Maternal genotype              | Rate of fast phase of oocyte pronuclear migration ( $\mu\text{m}/\text{sec}$ ) | % Embryo length at which pronuclei met <sup>a</sup> | Distance between centrosomes ( $\mu\text{m}$ )                                                       | Time from NEB to initiation of anaphase (sec)                                    | Time of P <sub>1</sub> centrosome separation (min) <sup>b</sup> | Distance of posterior spindle pole from posterior of embryo ( $\mu\text{m}$ )                  | Rate of posterior centrosome movement ( $\mu\text{m}/\text{sec}$ ) <sup>c</sup> |
|--------------------------------|--------------------------------------------------------------------------------|-----------------------------------------------------|------------------------------------------------------------------------------------------------------|----------------------------------------------------------------------------------|-----------------------------------------------------------------|------------------------------------------------------------------------------------------------|---------------------------------------------------------------------------------|
| wild type                      | 0.26 $\pm$ 0.03                                                                | 69 $\pm$ 4%                                         | 13.1 $\pm$ 0.6 <sup>d</sup><br>21.6 $\pm$ 0.7 <sup>e</sup>                                           | 238 $\pm$ 38 (16°C)<br>158 $\pm$ 37 (25°C)                                       | 5.4 $\pm$ 2.7                                                   | 23.6 $\pm$ 0.8 <sup>f</sup><br>9.9 $\pm$ 0.6 <sup>g</sup>                                      | 0.067 $\pm$ 0.005                                                               |
| <i>dhc-1</i> ( <i>ct76</i> )/+ | 0.13 $\pm$ 0.06<br><i>p</i> =7.5E-05                                           | 58 $\pm$ 3%<br><i>p</i> =5.05E-06                   | 11.3 $\pm$ 0.7 <sup>d</sup><br><i>p</i> =0.002<br>15.2 $\pm$ 4.1 <sup>e</sup><br><i>p</i> =0.017     | 284 $\pm$ 51 (16°C)<br><i>p</i> =0.03<br>583 $\pm$ 174 (25°C)<br><i>p</i> =0.009 | 17.3 $\pm$ 1.8                                                  | 23.8 $\pm$ 1.2 <sup>f</sup><br><i>p</i> =0.67<br>11.2 $\pm$ 1.3 <sup>g</sup><br><i>p</i> =0.08 | 0.056 $\pm$ 0.010<br><i>p</i> =0.035                                            |
| <i>dhc-1</i> ( <i>or195</i> )  | 0.21 $\pm$ 0.03<br><i>p</i> =1.4E-03                                           | 59 $\pm$ 4%<br><i>p</i> =5.8E-05                    | ND                                                                                                   | 340 $\pm$ 110 (25°C)<br><i>p</i> =0.013                                          | ND                                                              | 22.5 $\pm$ 2.2 <sup>f</sup><br><i>p</i> =0.21<br>10.3 $\pm$ 1.2 <sup>g</sup><br><i>p</i> =0.42 | 0.048 $\pm$ 0.013<br><i>p</i> =0.004                                            |
| <i>dhc-1</i> ( <i>ct42</i> )/+ | 0.20 $\pm$ 0.02<br><i>p</i> =8.6E-05                                           | 58 $\pm$ 2%<br><i>p</i> =4.3E-06                    | 10.4 $\pm$ 0.8 <sup>d</sup><br><i>p</i> =1.4E-07<br>17.5 $\pm$ 1.2 <sup>e</sup><br><i>p</i> =1.5E-08 | ND                                                                               | ND                                                              | 23.7 $\pm$ 2.7 <sup>f</sup><br><i>p</i> =0.93<br>10.5 $\pm$ 1.7 <sup>g</sup><br><i>p</i> =0.40 | 0.048 $\pm$ 0.010<br><i>p</i> =2.1E-04                                          |

Measurements  $\pm$  standard error were determined in 1-cell embryos obtained from mothers shifted to 25°C as L4 larvae, unless otherwise noted. All events were monitored by DIC microscopy; pronuclei and centrosomes are visible as granule-free spheres. *n*=10 for all measurements, except *n*=5 for *ct76* distance between centrosomes (the other five *ct76* embryos did not display discernable centrosome separation), *n*=6 for the right four *ct76* columns, and *n*=8 for the right two *or195* columns. *p* values were generated using a two-sample (wild type vs. *dhc-1*) unequal variance, two-tailed student t-test. *p* values of less than 0.05 are considered statistically significant.

<sup>a</sup> Anterior is 0%.

<sup>b</sup> Time of initiation of P<sub>1</sub> centrosome separation after the end of P<sub>0</sub> spindle pole separation at 16°C.

<sup>c</sup> Average rate of posterior centrosome movement toward the posterior cortex after NEB until the end of anaphase. Only embryos that underwent P<sub>0</sub> centrosome separation were analyzed.

<sup>d</sup> Average distance at NEB. Only *ct76* embryos that underwent P<sub>0</sub> centrosome separation were analyzed.

<sup>e</sup> Average distance at the end of spindle pole separation.

<sup>f</sup> Average distance at the end of pronuclear migration and centration, measured from the point of contact between the two pronuclei to the posterior cortex. Only embryos that underwent P<sub>0</sub> centrosome separation were analyzed.

<sup>g</sup> Average distance at late anaphase, measured from the center of the posterior centrosome to the posterior cortex.
